# Supplementary material for: The Center and Spin of the Universe
Source: Preprints.org preprint supplement (doi:10.20944/preprints202306.1689.v1), 2023-06-23
Supplement: Supplementary file 1 [file supplementary]

## Sheet: Sheet1
Table 1. Typical astronomical observations of cosmic anisotropies
Name	Observation	(l, b)	Magnitude	CL	Reference
CMB dipole	Higher temperature	(275°, 3°)a	464 km/sa		Kogut et al.1993, Aaronson et al.1986
Galaxy cluster anisotropy	Smaller H0 value	(280°±35°, -15°±20°)	0.09	5.5σ	Migkas et al. 2021
Bulk flows	Large scale flow	(283°±14°, 11°±14°)	600-1000 km/s (zmedian~0.1)		Kashlinsky et al. 2009
		(282°±11°, 6°±6°)	416±78 km/s (100 h-1 Mpc)		Feldman et al. 2010
		(319°±18°, 7°±14°)	249±76 km/s (50 h-1 Mpc)		Turnbull et al. 2012
Universe accelerating expansion	Slower expansion in the past	SED			Riess et al 1998; Perlmutter et al. 1999
Hubble tension	Smaller H0 value in the past	SED	0.08	5σ	Riess et al. 2022
S8 tension	Higher S8 value in the past	SED	5-10%	2-3σ	Battye et al. 2015; Perivolaropoulos & Skara 2022
Great Attractor	LS is attracted	(307°±11°, 9°±8°)	570±60 km/s		Lynden-Bell et al. 1988
		(325.3°, -7.2°)b			8
SNe Ia dipole	Brighter SNe Ia	(309.0°±22.4°, -19.3°±12.9°)		2σ	Chang & Lin 2015
Dark energy dipole	Lower accelerating expansion	(309.4°±18.0°, -15.1°±11.5°)		2σ	Mariano & Perivolaropoulos 2012
a constant dipole	Higher a constant	(320.5°±11.8°, -11.7°±7.5°)		3.9σ	Mariano & Perivolaropoulos 2012
		(330.1°±12.6°, -13.2°±11.3°)b		4.2σ	King et al. 2012
a) estimated by considering the Virgocentric flow; b) converted from the equatorial coordinates.
